# Supplementary material
Source: MDPI journal article supplement (https://www.mdpi.com/1996-1073/16/23/7896)
Supplement: s1 [file s1]

# Calorific Value Prediction Model Using Structure Composition of Heat-Treated Lignocellulosic Biomass

Sunyong Park <sup>1</sup>, Seon Yeop Kim <sup>2</sup>, Ha Eun Kim <sup>2</sup>, Kwang Cheol Oh <sup>3</sup>, Seok Jun Kim <sup>1</sup>,  
La Hoon Cho <sup>1</sup>, Young Kwang Jeon <sup>1</sup> and DaeHyun Kim <sup>1,3,\*</sup>

Table s1. Data from previous studies, 111 structural analyses and calorific value data

| No. | Type  | Biomass                                    | Cell  | Hemie | Lig    | Ref |
|-----|-------|--------------------------------------------|-------|-------|--------|-----|
| 1   | Woody | Loblolly pine wood                         | 47.89 | 20.28 | 28.5   | [1] |
| 2   | Woody | Torrefied loblolly pine wood (250°C 0.25h) | 46.27 | 16.43 | 32.2   |     |
| 3   | Woody | Torrefied loblolly pine wood (250°C 0.5h)  | 48.42 | 10.9  | 37.25  |     |
| 4   | Woody | Torrefied loblolly pine wood (250°C 1h)    | 49.37 | 7.65  | 41.62  |     |
| 5   | Woody | Torrefied loblolly pine wood (250°C 2h)    | 47.71 | 4.47  | 44.53  |     |
| 6   | Woody | Torrefied loblolly pine wood (250°C 4h)    | 44.24 | 1.75  | 52.33  |     |
| 7   | Woody | Torrefied loblolly pine wood (250°C 6h)    | 43.88 | 1.46  | 55.4   |     |
| 8   | Woody | Torrefied loblolly pine wood (250°C 8h)    | 38.31 | 0.71  | 57.8   |     |
| 9   | Woody | Torrefied loblolly pine wood (300°C 0.5h)  | 22.34 | 1.85  | 73.39  |     |
| 10  | Woody | Wood wastes                                | 53.5  | 16    | 20.6   | [2] |
| 11  | Woody | Torrefied wood wastes (225°C 30min)        | 49.4  | 15.43 | 20.7   |     |
| 12  | Woody | Torrefied wood wastes (275°C 30min)        | 46.5  | 3.4   | 35.5   |     |
| 13  | Woody | Torrefied wood wastes (300°C 30min)        | 34.71 | 4.58  | 48.7   |     |
| 14  | Woody | Torrefied wood wastes (225°C 60min)        | 43.3  | 14.12 | 25.3   |     |
| 15  | Woody | Torrefied wood wastes (275°C 60min)        | 46.63 | 5.2   | 38.3   |     |
| 16  | Woody | Torrefied wood wastes (300°C 60min)        | 30.5  | 5.1   | 55.9   |     |
| 17  | Woody | Poplar                                     | 50.11 | 22.54 | 24.71  | [3] |
| 18  | Woody | Beech                                      | 44.87 | 33.53 | 16.763 |     |
| 19  | Woody | Loblolly pine                              | 54    | 11.8  | 25     | [4] |
| 20  | Woody | Torrefied loblolly pine (250°C)            | 51    | 9.2   | 34.1   |     |
| 21  | Woody | Torrefied loblolly pine (275°C)            | 52.7  | 6.5   | 36.7   |     |
| 22  | Woody | Torrefied loblolly pine (300°C)            | 32.7  | 2.3   | 62.7   |     |
| 23  | Woody | Jack Pine                                  | 45    | 17.88 | 34.06  | [5] |
| 24  | Woody | Torrefied jack Pine (400°C)                | 13.82 | 0.42  | 83.65  |     |
| 25  | Woody | Torrefied jack Pine (454°C)                | 2.72  | 0.02  | 96.76  |     |
| 26  | Woody | Balsam Fir                                 | 40.72 | 31.99 | 24.29  |     |
| 27  | Woody | Black spruce                               | 44.66 | 23.2  | 28.83  |     |
| 28  | Woody | Torrefied black spruce (400°C)             | 9.55  | 0.28  | 89.59  |     |
| 29  | Woody | Acacia spp                                 | 43.16 | 28.53 | 23.69  | [6] |
| 30  | Woody | Torrefied Acacia spp (200°C 15min)         | 44.45 | 23.67 | 26.36  |     |

|    |        |                                            |       |       |       |      |
|----|--------|--------------------------------------------|-------|-------|-------|------|
| 31 | Woody  | Torrefied Acacia spp (200°C 30min)         | 45.02 | 21.17 | 27.7  |      |
| 32 | Woody  | Torrefied Acacia spp (200°C 45min)         | 46.09 | 19.3  | 28.12 |      |
| 33 | Woody  | Macaranga spp.                             | 45.64 | 23.1  | 27.03 |      |
| 34 | Woody  | Torrefied Macaranga spp (200°C 15min)      | 48    | 19.06 | 28.07 |      |
| 35 | Woody  | Torrefied Macaranga spp (200°C 30min)      | 49.02 | 15.72 | 29.34 |      |
| 36 | Woody  | Torrefied Macaranga spp (200°C 45min)      | 48.91 | 16.63 | 29.74 |      |
| 37 | Woody  | Torrefied Macaranga spp (250°C 15min)      | 50.45 | 12.45 | 31.05 |      |
| 38 | Woody  | Torrefied Macaranga spp (200°C 30min)      | 49.58 | 10.84 | 32.61 |      |
| 39 | Woody  | Empty fruit branch                         | 44.24 | 30.61 | 12.69 |      |
| 40 | Woody  | Torrefied Empty fruit branch (200°C 15min) | 48.71 | 21.08 | 16.21 |      |
| 41 | Woody  | Torrefied Empty fruit branch (300°C 15min) | 47.1  | 16.12 | 23.28 |      |
| 42 | Woody  | Oil Palm Trunk                             | 33.44 | 40.21 | 10.84 |      |
| 43 | Woody  | Torrefied Oil Palm Trunk (200°C 15min)     | 38.06 | 35.44 | 11.12 |      |
| 44 | Woody  | Torrefied Oil Palm Trunk (200°C 30min)     | 46.98 | 28.99 | 11.89 |      |
| 45 | Woody  | Torrefied Oil Palm Trunk (200°C 45min)     | 45.34 | 29.35 | 12.82 |      |
| 46 | Woody  | Torrefied Oil Palm Trunk (250°C 15min)     | 46.14 | 28.01 | 12.07 |      |
| 47 | Woody  | Torrefied Oil Palm Trunk (250°C 30min)     | 44.11 | 27.42 | 14.41 |      |
| 48 | Woody  | Torrefied Oil Palm Trunk (250°C 45min)     | 42.76 | 27.37 | 16.82 |      |
| 49 | Woody  | Torrefied Oil Palm Trunk (300°C 15min)     | 42.01 | 27.18 | 19.55 |      |
| 50 | Woody  | Torrefied Oil Palm Trunk (300°C 30min)     | 39.96 | 26.27 | 23.87 |      |
| 51 | Woody  | Torrefied Oil Palm Trunk (300°C 45min)     | 36.76 | 23.19 | 27.95 |      |
| 52 | Woody  | Torrefied mixed waste wood (200°C)         | 39.4  | 24.6  | 28.1  | [7]  |
| 53 | Woody  | Torrefied mixed waste wood (250°C)         | 42.8  | 16.7  | 32.9  |      |
| 54 | Woody  | Torrefied mixed waste wood (300°C)         | 38.3  | 13.3  | 39.3  |      |
| 55 | Woody  | Oak waste wood                             | 38.3  | 25.5  | 22    |      |
| 56 | Woody  | Torrefied oak waste wood (200°C)           | 41.1  | 26.3  | 26.5  |      |
| 57 | Woody  | Torrefied oak waste wood (250°C)           | 43.7  | 7.7   | 31.4  |      |
| 58 | Woody  | Torrefied oak waste wood (300°C)           | 36.2  | 5.3   | 43.7  | [8]  |
| 59 | Woody  | Lauan                                      | 40.49 | 15.74 | 43.77 |      |
| 60 | Herbal | Torrefied oat hull (225°C)                 | 34.4  | 27.34 | 15.4  | [9]  |
| 61 | Herbal | Torrefied oat hull (255°C)                 | 38.92 | 0.81  | 35.18 |      |
| 62 | Herbal | Torrefied sugar bagasse (230°C)            | 31.09 | 13.13 | 46.2  | [10] |
| 63 | Herbal | Barley straw                               | 41.5  | 36.3  | 8.8   | [2]  |
| 64 | Herbal | Torrefied barley straw (225°C 30min)       | 39.8  | 32.4  | 10.25 |      |
| 65 | Herbal | Torrefied barley straw (275°C 60min)       | 48    | 2.6   | 33    |      |
| 66 | Herbal | Torrefied barley straw (300°C 60min)       | 5.5   | 5     | 48.2  |      |
| 67 | Herbal | Cumin stalk                                | 44    | 11.3  | 10.86 |      |
| 68 | Herbal | Torrefied cumin stalk (225°C 30min)        | 38.8  | 11.3  | 17.3  |      |
| 69 | Herbal | Torrefied cumin stalk (275°C 30min)        | 24    | 5     | 34.1  |      |
| 70 | Herbal | Torrefied cumin stalk (225°C 60min)        | 39.76 | 6.86  | 18.2  |      |

|     |        |                                                        |       |       |       |      |
|-----|--------|--------------------------------------------------------|-------|-------|-------|------|
| 71  | Herbal | Torrefied cumin stalk (300°C 60min)                    | 9.26  | 4.31  | 35.3  | [11] |
| 72  | Herbal | Bamboo                                                 | 50    | 23    | 28    |      |
| 73  | Herbal | Torrefied bamboo (210°C)                               | 56    | 14    | 30    |      |
| 74  | Herbal | Torrefied bamboo (240°C)                               | 58    | 7     | 34    |      |
| 75  | Herbal | Torrefied bamboo (270°C)                               | 53    | 2     | 45    |      |
| 76  | Herbal | Torrefied sugarcane bagasse (200°C 15min)              | 37.1  | 24.9  | 21.5  | [12] |
| 77  | Herbal | Torrefied sugarcane bagasse (200°C 30min)              | 36.9  | 24.2  | 22.8  |      |
| 78  | Herbal | Torrefied sugarcane bagasse (200°C 45min)              | 35.7  | 23.5  | 24.9  |      |
| 79  | Herbal | Torrefied sugarcane bagasse (200°C 60min)              | 35.1  | 22.9  | 26.6  |      |
| 80  | Herbal | Torrefied sugarcane bagasse (225°C 15min)              | 36.9  | 23.8  | 22.8  |      |
| 81  | Herbal | Torrefied sugarcane bagasse (225°C 30min)              | 34.8  | 22.2  | 26.6  |      |
| 82  | Herbal | Torrefied sugarcane bagasse (225°C 45min)              | 33.2  | 21.9  | 28.8  |      |
| 83  | Herbal | Torrefied sugarcane bagasse (250°C 15min)              | 33.6  | 21.5  | 28.6  |      |
| 84  | Herbal | Torrefied sugarcane bagasse (250°C 30min)              | 31.3  | 20.1  | 32.4  |      |
| 85  | Herbal | Torrefied sugarcane bagasse (250°C 45min)              | 30.4  | 19.8  | 33.7  |      |
| 86  | Herbal | Torrefied sugarcane bagasse (275°C 15min)              | 29.9  | 19.7  | 33.8  |      |
| 87  | Herbal | Torrefied sugarcane bagasse (275°C 30min)              | 25.9  | 17.6  | 40.3  |      |
| 88  | Herbal | Torrefied sugarcane bagasse (300°C 15min)              | 20.3  | 10.6  | 52.4  |      |
| 89  | Herbal | Conservation Reserve Program biomass                   | 30.18 | 23.12 | 13.01 | [13] |
| 90  | Herbal | Torrefied conservation Reserve Program biomass (200°C) | 27.62 | 20.05 | 14.08 |      |
| 91  | Herbal | Torrefied conservation Reserve Program biomass (250°C) | 26.95 | 19.38 | 15.84 |      |
| 92  | Herbal | Torrefied conservation Reserve Program biomass (300°C) | 22.49 | 8.87  | 19.25 |      |
| 93  | Herbal | Torrefied verge grass (230°C 15min)                    | 26.22 | 12.84 | 39.64 | [14] |
| 94  | Herbal | Torrefied verge grass (250°C 15min)                    | 25.35 | 10.96 | 41.09 |      |
| 95  | Herbal | Torrefied verge grass (270°C 15min)                    | 19.46 | 5.44  | 54.52 |      |
| 96  | Herbal | Torrefied verge grass (290°C 15min)                    | 1.99  | 0.59  | 75.82 |      |
| 97  | Herbal | Torrefied verge grass (250°C 30min)                    | 24.1  | 7.69  | 47.6  |      |
| 98  | Herbal | Torrefied verge grass (270°C 30min)                    | 16.06 | 4.99  | 57.34 |      |
| 99  | Herbal | Bagasse                                                | 40.19 | 19.74 | 28.75 |      |
| 100 | Herbal | Torrefied bagasse (250°C 15min)                        | 41.74 | 16.9  | 30.91 |      |
| 101 | Herbal | Torrefied bagasse (290°C 15min)                        | 48.74 | 5.56  | 44.73 |      |
| 102 | Herbal | Torrefied bagasse (310°C 15min)                        | 37.6  | 3.32  | 50.23 |      |
| 103 | Herbal | Torrefied bagasse (250°C 30min)                        | 48.04 | 13.58 | 34.65 |      |
| 104 | Herbal | Torrefied bagasse (270°C 30min)                        | 41.63 | 7.24  | 42.59 |      |
| 105 | Herbal | Torrefied bagasse (290°C 30min)                        | 43.12 | 5.32  | 44.82 |      |
| 106 | Herbal | Torrefied bagasse (310°C 30min)                        | 25.87 | 2.03  | 57.34 |      |
| 107 | Herbal | Torrefied rice husk (200°C)                            | 41.69 | 17.62 | 20.96 | [15] |
| 108 | Herbal | Torrefied rice husk (250°C)                            | 39.38 | 11.12 | 27.3  |      |
| 109 | Herbal | Torrefied rice husk (300°C)                            | 23.15 | 0.2   | 54.02 |      |
| 110 | Herbal | Torrefied rice straw (250°C)                           | 39.76 | 20.08 | 17.27 |      |

|     |        |                              |       |      |      |  |
|-----|--------|------------------------------|-------|------|------|--|
| 111 | Herbal | Torrefied rice straw (300°C) | 10.89 | 5.89 | 64.9 |  |
|-----|--------|------------------------------|-------|------|------|--|

1. Ben, H.; Ragauskas, A.J. Torrefaction of Loblolly Pine. *Green Chemistry* **2012**, *14*, 72–76, doi:10.1039/c1gc15570a.
2. Cahyanti, M.N.; Doddapaneni, T.R.K.C.; Madisoo, M.; Pärn, L.; Virro, I.; Kikas, T. Torrefaction of Agricultural and Wood Waste: Comparative Analysis of Selected Fuel Characteristics. *Energies (Basel)* **2021**, *14*, doi:10.3390/en14102774.
3. Lin, Y.Y.; Chen, W.H.; Colin, B.; Pétrissans, A.; Lopes Quirino, R.; Pétrissans, M. Thermodegradation Characterization of Hardwoods and Softwoods in Torrefaction and Transition Zone between Torrefaction and Pyrolysis. *Fuel* **2022**, *310*, doi:10.1016/j.fuel.2021.122281.
4. Reza, M.T.; Uddin, M.H.; Lynam, J.G.; Coronella, C.J. Engineered Pellets from Dry Torrefied and HTC Biochar Blends. *Biomass Bioenergy* **2014**, *63*, 229–238, doi:10.1016/j.biombioe.2014.01.038.
5. Arous, S.; Koubaa, A.; Bouafif, H.; Bouslimi, B.; Braghiroli, F.L.; Bradai, C. Effect of Pyrolysis Temperature and Wood Species on the Properties of Biochar Pellets. *Energies (Basel)* **2021**, *14*, doi:10.3390/en14206529.
6. Chin, K.L.; H'ng, P.S.; Go, W.Z.; Wong, W.Z.; Lim, T.W.; Maminski, M.; Paridah, M.T.; Luqman, A.C. Optimization of Torrefaction Conditions for High Energy Density Solid Biofuel from Oil Palm Biomass and Fast Growing Species Available in Malaysia. *Ind Crops Prod* **2013**, *49*, 768–774, doi:10.1016/j.indcrop.2013.06.007.
7. Ivanovski, M.; Goricanec, D.; Krope, J.; Urbancl, D. Torrefaction Pretreatment of Lignocellulosic Biomass for Sustainable Solid Biofuel Production. *Energy* **2022**, *240*, doi:10.1016/j.energy.2021.122483.
8. Chen, W.H.; Hsu, H.C.; Lu, K.M.; Lee, W.J.; Lin, T.C. Thermal Pretreatment of Wood (Lauan) Block by Torrefaction and Its Influence on the Properties of the Biomass. *Energy* **2011**, *36*, 3012–3021, doi:10.1016/j.energy.2011.02.045.
9. Valdez, E.; Tabil, L.G.; Mupondwa, E.; Cree, D.; Moazed, H. Microwave Torrefaction of Oat Hull: Effect of Temperature and Residence Time. *Energies (Basel)* **2021**, *14*, doi:10.3390/en14144298.
10. Granados, D.A.; Ruiz, R.A.; Vega, L.Y.; Chejne, F. Study of Reactivity Reduction in Sugarcane Bagasse as Consequence of a Torrefaction Process. *Energy* **2017**, *139*, 818–827,

doi:10.1016/j.energy.2017.08.013.

11. Ma, Z.; Zhang, Y.; Shen, Y.; Wang, J.; Yang, Y.; Zhang, W.; Wang, S. Oxygen Migration Characteristics during Bamboo Torrefaction Process Based on the Properties of Torrefied Solid, Gaseous, and Liquid Products. *Biomass Bioenergy* **2019**, *128*, doi:10.1016/j.biombioe.2019.105300.
12. Kanwal, S.; Chaudhry, N.; Munir, S.; Sana, H. Effect of Torrefaction Conditions on the Physicochemical Characterization of Agricultural Waste (Sugarcane Bagasse). *Waste Management* **2019**, *88*, 280–290, doi:10.1016/j.wasman.2019.03.053.
13. Xu, F.; Linnebur, K.; Wang, D. Torrefaction of Conservation Reserve Program Biomass: A Techno-Economic Evaluation. *Ind Crops Prod* **2014**, *61*, 382–387, doi:10.1016/j.indcrop.2014.07.030.
14. Joshi, Y.; Di Marcello, M.; De Jong, W. Torrefaction: Mechanistic Study of Constituent Transformations in Herbaceous Biomass. *J Anal Appl Pyrolysis* **2015**, *115*, 353–361, doi:10.1016/j.jaap.2015.08.014.
15. Chen, C.; Qu, B.; Wang, W.; Wang, W.; Ji, G.; Li, A. Rice Husk and Rice Straw Torrefaction: Properties and Pyrolysis Kinetics of Raw and Torrefied Biomass. *Environ Technol Innov* **2021**, *24*, doi:10.1016/j.eti.2021.101872.
